# Supplementary material
Source: publisher site journal article supplement (https://www.dovepress.com/article/331549)
Supplement: Supplementary file 1 [file get_supplementary_file.php]

**Supplementary Table 1.** The 71 signaling pathway in which TRDMT1, NSUN6 and ALKBH1 all participated.

**Abbreviation:** TRDMT1, tRNA aspartic acid methyltransferase 1; NSUN6, NOP2/Sun RNA methyltransferase 6; ALKBH1, AlkB Homolog 1.

| ID | Description |
| --- | --- |
| KEGG__CHEMOKINE__SIGNALING__PATHWAY | CHEMOKINE SIGNALING PATHWAY |
| KEGG__CYTOKINE__CYTOKINE__RECEPTOR__INTERACTION | CYTOKINE CYTOKINE RECEPTOR INTERACTION |
| KEGG__DNA__REPLICATION | DNA REPLICATION |
| KEGG__LEISHMANIA__INFECTION | LEISHMANIA INFECTION |
| KEGG__PYRIMIDINE__METABOLISM | PYRIMIDINE METABOLISM |
| KEGG__RIBOSOME | RIBOSOME |
| KEGG__SPLICEOSOME | SPLICEOSOME |
| KEGG__PURINE__METABOLISM | PURINE METABOLISM |
| KEGG__PROTEASOME | PROTEASOME |
| KEGG__VALINE__LEUCINE__AND__ISOLEUCINE__DEGRADATION | VALINE LEUCINE AND ISOLEUCINE DEGRADATION |
| KEGG__UBIQUITIN__MEDIATED__PROTEOLYSIS | UBIQUITIN MEDIATED PROTEOLYSIS |
| KEGG__NATURAL__KILLER__CELL__MEDIATED__CYTOTOXICITY | NATURAL KILLER CELL MEDIATED CYTOTOXICITY |
| KEGG__BASE__EXCISION__REPAIR | BASE EXCISION REPAIR |
| KEGG__T__CELL__RECEPTOR__SIGNALING__PATHWAY | T CELL RECEPTOR SIGNALING PATHWAY |
| KEGG__ALLOGRAFT__REJECTION | ALLOGRAFT REJECTION |
| KEGG__SYSTEMIC__LUPUS__ERYTHEMATOSUS | SYSTEMIC LUPUS ERYTHEMATOSUS |
| KEGG__OOCYTE__MEIOSIS | OOCYTE MEIOSIS |
| KEGG__APOPTOSIS | APOPTOSIS |
| KEGG__AXON__GUIDANCE | AXON GUIDANCE |
| KEGG__P53__SIGNALING__PATHWAY | P53 SIGNALING PATHWAY |
| KEGG__ANTIGEN__PROCESSING__AND__PRESENTATION | ANTIGEN PROCESSING AND PRESENTATION |
| KEGG__TYPE__I__DIABETES__MELLITUS | TYPE I DIABETES MELLITUS |
| KEGG__RIG__I__LIKE__RECEPTOR__SIGNALING__PATHWAY | RIG I LIKE RECEPTOR SIGNALING PATHWAY |
| KEGG__ARGININE__AND__PROLINE__METABOLISM | ARGININE AND PROLINE METABOLISM |
| KEGG__PANCREATIC__CANCER | PANCREATIC CANCER |
| KEGG__GLUTATHIONE__METABOLISM | GLUTATHIONE METABOLISM |
| KEGG__RNA__POLYMERASE | RNA POLYMERASE |
| KEGG__BIOSYNTHESIS__OF__UNSATURATED__FATTY__ACIDS | BIOSYNTHESIS OF UNSATURATED FATTY ACIDS |
| KEGG__AMINO__SUGAR__AND__NUCLEOTIDE__SUGAR__METABOLISM | AMINO SUGAR AND NUCLEOTIDE SUGAR METABOLISM |
| KEGG__BASAL__CELL__CARCINOMA | BASAL CELL CARCINOMA |
| KEGG__COMPLEMENT__AND__COAGULATION__CASCADES | COMPLEMENT AND COAGULATION CASCADES |
| KEGG__PEROXISOME | PEROXISOME |
| KEGG__MAPK__SIGNALING__PATHWAY | MAPK SIGNALING PATHWAY |
| KEGG__CELL__ADHESION__MOLECULES__CAMS | CELL ADHESION MOLECULES CAMS |
| KEGG__N__GLYCAN__BIOSYNTHESIS | N GLYCAN BIOSYNTHESIS |
| KEGG__PROGESTERONE__MEDIATED__OOCYTE__MATURATION | PROGESTERONE MEDIATED OOCYTE MATURATION |
| KEGG__OXIDATIVE__PHOSPHORYLATION | OXIDATIVE PHOSPHORYLATION |
| KEGG__HUNTINGTONS__DISEASE | HUNTINGTONS DISEASE |
| KEGG__BLADDER__CANCER | BLADDER CANCER |
| KEGG__BUTANOATE__METABOLISM | BUTANOATE METABOLISM |
| KEGG__SPHINGOLIPID__METABOLISM | SPHINGOLIPID METABOLISM |
| KEGG__TYPE__II__DIABETES__MELLITUS | TYPE II DIABETES MELLITUS |
| KEGG__FC__EPSILON__RI__SIGNALING__PATHWAY | FC EPSILON RI SIGNALING PATHWAY |
| KEGG__CARDIAC__MUSCLE__CONTRACTION | CARDIAC MUSCLE CONTRACTION |
| KEGG__NEUROACTIVE__LIGAND__RECEPTOR__INTERACTION | NEUROACTIVE LIGAND RECEPTOR INTERACTION |
| KEGG__ABC__TRANSPORTERS | ABC TRANSPORTERS |
| KEGG__SNARE__INTERACTIONS__IN__VESICULAR__TRANSPORT | SNARE INTERACTIONS IN VESICULAR TRANSPORT |
| KEGG__ECM__RECEPTOR__INTERACTION | ECM RECEPTOR INTERACTION |
| KEGG__MELANOGENESIS | MELANOGENESIS |
| KEGG__ALDOSTERONE__REGULATED__SODIUM__REABSORPTION | ALDOSTERONE REGULATED SODIUM REABSORPTION |
| KEGG__FRUCTOSE__AND__MANNOSE__METABOLISM | FRUCTOSE AND MANNOSE METABOLISM |
| KEGG__ARRHYTHMOGENIC__RIGHT__VENTRICULAR__CARDIOMYOPATHY__ARVC | ARRHYTHMOGENIC RIGHT VENTRICULAR CARDIOMYOPATHY ARVC |
| KEGG__ETHER__LIPID__METABOLISM | ETHER LIPID METABOLISM |
| KEGG__ALZHEIMERS__DISEASE | ALZHEIMERS DISEASE |
| KEGG__LYSOSOME | LYSOSOME |
| KEGG__PPAR__SIGNALING__PATHWAY | PPAR SIGNALING PATHWAY |
| KEGG__HEDGEHOG__SIGNALING__PATHWAY | HEDGEHOG SIGNALING PATHWAY |
| KEGG__FOCAL__ADHESION | FOCAL ADHESION |
| KEGG__CALCIUM__SIGNALING__PATHWAY | CALCIUM SIGNALING PATHWAY |
| KEGG__SMALL__CELL__LUNG__CANCER | SMALL CELL LUNG CANCER |
| KEGG__EPITHELIAL__CELL__SIGNALING__IN__HELICOBACTER__PYLORI__INFECTION | EPITHELIAL CELL SIGNALING IN HELICOBACTER PYLORI INFECTION |
| KEGG__WNT__SIGNALING__PATHWAY | WNT SIGNALING PATHWAY |
| KEGG__OLFACTORY__TRANSDUCTION | OLFACTORY TRANSDUCTION |
| KEGG__PHOSPHATIDYLINOSITOL__SIGNALING__SYSTEM | PHOSPHATIDYLINOSITOL SIGNALING SYSTEM |
| KEGG__CITRATE__CYCLE__TCA__CYCLE | CITRATE CYCLE TCA CYCLE |
| KEGG__B__CELL__RECEPTOR__SIGNALING__PATHWAY | B CELL RECEPTOR SIGNALING PATHWAY |
| KEGG__VIRAL__MYOCARDITIS | VIRAL MYOCARDITIS |
| KEGG__CHRONIC__MYELOID__LEUKEMIA | CHRONIC MYELOID LEUKEMIA |
| KEGG__PROSTATE__CANCER | PROSTATE CANCER |
| KEGG__FC__GAMMA__R__MEDIATED__PHAGOCYTOSIS | FC GAMMA R MEDIATED PHAGOCYTOSIS |
| KEGG__GNRH__SIGNALING__PATHWAY | GNRH SIGNALING PATHWAY |
